# Supplementary material for: Tumor Transcriptome Sequencing Reveals Allelic Expression Imbalances Associated with Copy Number Alterations
Source: PubMed Central journal article supplement (PMC2824832; doi:10.1371/journal.pone.0009317), 2010-02-19
Supplement: pone.0009317.s013.pdf [file pone.0009317.s013.pdf]

|            | AI? | Gene Expression<br>log2 (Tumor/Normal) |      |           |      |            |                   | Allelic Imbalance (AI) |      |           |      |              |      | neighbor concord? | adhesion/ECM/lumina? |           |         |             |                                                        |                                                                                                                                                                                                                                                                                                                                                    |
|------------|-----|----------------------------------------|------|-----------|------|------------|-------------------|------------------------|------|-----------|------|--------------|------|-------------------|----------------------|-----------|---------|-------------|--------------------------------------------------------|----------------------------------------------------------------------------------------------------------------------------------------------------------------------------------------------------------------------------------------------------------------------------------------------------------------------------------------------------|
|            |     | Patient 33                             |      | Patient 8 |      | Patient 51 |                   | Patient 33             |      | Patient 8 |      | Patient 51   |      |                   |                      |           |         |             |                                                        |                                                                                                                                                                                                                                                                                                                                                    |
|            |     | 8                                      | 33   | 51        | 1->2 | 2->1       | 2->2              | 1->2                   | 2->1 | 2->2      | 1->2 | 2->1         | 2->2 |                   |                      |           |         |             |                                                        |                                                                                                                                                                                                                                                                                                                                                    |
| DST        | ●●● | -1.3                                   | 0.1  | 1.0       |      | L>F        |                   |                        |      |           |      | G>R          |      |                   |                      |           | chr6 -  | 56,596,090  | dystronin isoform 1e precursor                         | member of the plakun protein family of adhesion junction plaque proteins. some isoforms are expressed in epithelial tissue, anchoring keratin-containing intermediate                                                                                                                                                                              |
| PERP       | ●●● | 0.7                                    | 0.0  | 0.7       |      |            | 3 (2)             |                        |      |           |      | Syn, R->P    |      |                   |                      |           | chr6 -  | 138,461,949 | PERP, TP53 apoptosis effector                          | downregulation of PERP correlated with metastatic capacity of human melanoma cell lines                                                                                                                                                                                                                                                            |
| FAT2       | ●●● | 0.1                                    | 0.3  | 1.9       |      |            |                   |                        |      |           |      | Syn          |      | S->L, I           | I->M, Syn            |           | chr5 -  | 150,896,272 | FAT tumor suppressor homolog 2                         | Drosophila and human homolog is a tumor suppressor gene                                                                                                                                                                                                                                                                                            |
| MALAT1     | ●●● | 0.3                                    | -0.6 | 0.3       |      | NC         |                   |                        |      |           |      | NC           |      |                   |                      | NC        | chr11 + | 65,026,161  | metastasis associated lung adenocarcinoma transcript 1 | metastasis associated lung adenocarcinoma transcript 1 (non-protein coding) (MALAT1), non-coding RNA.                                                                                                                                                                                                                                              |
| DS3C       | ●●● | 0.6                                    | 0.5  | 1.1       |      |            | 3                 |                        |      |           |      | 3, K>R, S->T |      |                   |                      | 3 (3)     | chr18 + | 26,850,414  | desmocollin 3 associated Dsc3a preproprotein           | a calcium-dependent glycoprotein that is a member of the desmocollin subfamily. cell adhesion and desmosome formation.                                                                                                                                                                                                                             |
| CD44       | ●●● | -0.9                                   | 0.5  | 1.3       |      | Syn, I     |                   |                        |      |           |      | K>R          |      |                   |                      | I/NSS     | chr11 + | 35,163,759  | CD44 molecule                                          | adhesion molecule involved in migration, cell fusion and resorption in osteoclasts that also plays a role in cellular metastasis.                                                                                                                                                                                                                  |
| GIB2       | ●●● | 0.6                                    | -0.7 | 1.2       |      |            |                   |                        |      |           |      | W->C         |      |                   |                      | I, 3      | chr13 - | 19,662,360  | gap junction protein, beta 2                           | forms gap junctions; may play a role in epididymal development                                                                                                                                                                                                                                                                                     |
| CTNND1     | ●●● | 1.2                                    | 0.0  | 1.0       |      | I, 3       |                   |                        |      |           |      |              |      |                   |                      | I, 3      | chr11 + | 57,314,519  | catenin, delta 1 isoform 1A                            | member of the Armadillo protein family, which function in adhesion between cells and signal transduction. Multiple translation initiation codons                                                                                                                                                                                                   |
| CND1       | ●●● | 3.7                                    | -0.1 | 1.2       |      |            | 3                 | 3                      |      |           |      |              |      |                   |                      |           | chr11 + | 69,171,738  | cyclin D1                                              | regulatory subunit of CDK4 or CDK6; involved in regulation of the G1/S transition of the cell cycle                                                                                                                                                                                                                                                |
| DSP        | ●●● | -0.1                                   | -0.3 | 1.6       |      | I->F, Syn  |                   |                        |      |           |      |              | Syn  |                   |                      |           | chr6 +  | 7,509,407   | desmoplakin isoform I                                  | Desmosomes are intercellular junctions that tightly link adjacent cells. Desmoplakin is an obligate component of functional desmosomes that anchors intermediate filaments to plakophilin 1 and plakoglobin. The C-terminus of desmoplakin binds with intermediate filaments. In the mid-region of desmoplakin, a coiled-coiled rod domain is resp |
| PKP1       | ●●● | 0.0                                    | 0.6  | 1.5       |      | I, I/NSS   |                   |                        |      |           |      |              |      |                   |                      | I         | chr1 +  | 199,543,971 | plakophilin 1                                          | may be involved in molecular recruitment and stabilization during desmosome formation.                                                                                                                                                                                                                                                             |
| S100A2     | ●●● | 0.1                                    | 0.7  | 1.3       |      | I/NSS      |                   |                        |      |           |      |              |      |                   |                      | I/NSS     | chr1 -  | 151,802,569 | S100 calcium binding protein A2                        | a member of the S100 family of proteins containing 2 EF-hand calcium-binding motifs. S100 proteins are involved in the regulation of cell cycle progression and differe                                                                                                                                                                            |
| SKP1       | ●●● | 0.2                                    | -0.6 | -0.4      |      |            |                   |                        |      |           |      |              | 5    |                   |                      | 5         | chr5 -  | 133,530,302 | S-phase kinase-associated protein 1                    | component of SCF complexes, which are composed of this protein, cyclin 1, a ring-box protein, and one member of the F-box family of proteins. This protein binds diere                                                                                                                                                                             |
| NCRNA00084 | ●●● | 0.4                                    | 0.1  | -0.3      |      |            | NC (5)            |                        | NC   |           |      | NC (3)       |      |                   |                      |           | chr11 + | 64,956,406  | 0                                                      | 0                                                                                                                                                                                                                                                                                                                                                  |
| POLR2A     | ●●● | -0.5                                   | 1.2  | 0.4       |      |            |                   |                        |      |           |      |              | Syn  |                   |                      | 3         | chr17 - | 7,343,614   | polymerase (RNA) II (DNA directed) polypeptide         | largest subunit of RNA polymerase II, the polymerase responsible for synthesizing messenger RNA in eukaryotes. The product of this gene contains a carboxy terminal                                                                                                                                                                                |
| KRT14      | ●●● | -0.5                                   | 0.4  | 0.9       |      |            |                   |                        |      |           |      | Syn, I/NSS   |      |                   |                      |           | chr17 - | 36,994,366  | keratin 14                                             | member of the keratin family, the most diverse group of intermediate filaments. a type I keratin, is usually found as a heterodimer with two keratin 5 molecules, a                                                                                                                                                                                |
| KIF9       | ●●● | -0.6                                   | -2.1 | -2.0      |      | III        |                   |                        |      |           |      |              | NC   |                   |                      |           | chr11 - | 1,974,311   | 0                                                      | 0                                                                                                                                                                                                                                                                                                                                                  |
| RUNX1      | ●●● | 0.6                                    | 1.0  | -0.4      |      |            |                   |                        |      |           |      |              | III  |                   |                      |           | chr21 + | 35,212,715  | runt-related transcription factor 1                    | putative transcription factor that may be involved in skeletal muscle gene regulation; human homolog is associated with a form of acute myeloid leukemia                                                                                                                                                                                           |
| KRT1       | ●●● | 0.8                                    | -3.0 | 1.5       |      | 3          |                   |                        |      |           |      |              |      |                   |                      | Syn       | chr12 - | 51,357,622  | keratin complex 2, basic, gene 1                       | 0                                                                                                                                                                                                                                                                                                                                                  |
| MAP4       | ●●● | -1.5                                   | -0.1 | -1.0      |      |            |                   |                        |      |           |      |              |      |                   |                      |           | chr3 -  | 47,897,033  | microtubule-associated protein 4                       | a major non-neuronal microtubule-associated protein. This protein contains a domain similar to the microtubule-binding domains of neuronal microtubule-associated                                                                                                                                                                                  |
| KRT6A      | ●●● | -1.8                                   | -0.1 | 0.9       |      |            | 3 (2), I (3)      |                        |      |           |      |              |      |                   |                      | I, 3      | chr12 - | 51,170,336  | keratin 6A                                             | The protein encoded by this gene is a member of the keratin gene family. The type I cytokeratins consist of basic or neutral proteins which are arranged in pairs of he                                                                                                                                                                            |
| HSPG2      | ●●● | 0.1                                    | 0.4  | -1.1      |      |            |                   |                        |      |           |      |              |      |                   |                      | R->H      | chr1 -  | 22,078,830  | heparan sulfate proteoglycan 2                         | Heparan sulfate proteoglycan is a major component of basement membranes, where the molecule may be involved in the stabilization of other molecules as well as b                                                                                                                                                                                   |
| HNRNPH1    | ●●● | -0.1                                   | -0.5 | -0.3      |      |            |                   |                        |      |           |      |              |      |                   |                      | I         | chr5 -  | 178,978,556 | heterogeneous nuclear ribonucleoprotein H1             | interacts with PKC-zeta and GABA(C) receptors to form ternary postsynaptic complex in the retina                                                                                                                                                                                                                                                   |
| SCSTM1     | ●●● | 0.3                                    | 0.9  | -0.7      |      |            |                   |                        |      |           |      |              |      |                   |                      | Syn (2)   | chr5 +  | 179,189,065 | sequestosome 1 isoform 1                               | ...                                                                                                                                                                                                                                                                                                                                                |
| HLA-A      | ●●● | -0.3                                   | 0.3  | 0.5       |      |            |                   |                        |      |           |      |              |      |                   |                      | 3         | chr6 +  | 30,019,971  | major histocompatibility complex, class I, A           | HLA-A belongs to the HLA class I heavy chain paralogues. This class I molecule is a heterodimer consisting of a heavy chain and a light chain (beta-2 microglobulin). Cla                                                                                                                                                                          |
| NDST1      | ●●● | -0.3                                   | 0.0  | -0.7      |      |            | Syn               |                        |      |           |      |              |      |                   |                      |           | chr5 +  | 149,892,916 | N-deacetylase/N-sulfotransferase (heparan              | enzyme that catalyzes the transfer of sulfate from 3'-phosphoadenosine 5'-phosphosulfate to the nitrogen of glucosamine in heparan sulfate                                                                                                                                                                                                         |
| EIF4G1     | ●●● | 0.8                                    | 1.2  | 0.6       |      |            |                   |                        |      |           |      |              |      |                   |                      | Syn       | chr3 +  | 185,525,445 | eukaryotic translation initiation factor 4             | a component of the protein complex EIF4F, which is involved in the recognition of the mRNA cap, ATP-dependent unwinding of 5'-terminal secondary structure, and ri                                                                                                                                                                                 |
| EPN2       | ●●● | -0.8                                   | 0.3  | 0.4       |      |            | I                 |                        |      |           |      |              |      |                   |                      | 3         | chr17 + | 19,130,952  | epin 2 isoform b                                       | may mediate membrane dynamics at the cell surface                                                                                                                                                                                                                                                                                                  |
| PITX1      | ●●● | -0.9                                   | -0.7 | -2.8      |      |            | Syn               | I                      |      |           |      |              |      |                   |                      | Syn       | chr5 -  | 134,394,593 | paired-like homeobox domain 1                          | paired-like homeobox transcription factor; transcription regulator of pituitary genes; genetic marker for nascent Rathke's pouch, precursor of anterior and intermedia                                                                                                                                                                             |
| ALDH3A1    | ●●● | -0.9                                   | 1.4  | -2.4      |      |            | 3                 | Syn                    |      |           |      |              |      |                   |                      | D->G      | chr17 - | 19,585,628  | aldehyde dehydrogenase 3A1                             | aldehyde dehydrogenase that is expressed during hepatocarcinogenesis                                                                                                                                                                                                                                                                               |
| CTSB       | ●●● | 0.4                                    | 1.4  | -0.5      |      |            |                   |                        |      |           |      |              |      |                   |                      | 3, L->V   | chr8 -  | 11,750,249  | cathepsin B preproprotein                              | lysosomal peptidase                                                                                                                                                                                                                                                                                                                                |
| ACTG1      | ●●● | 0.5                                    | 0.4  | 0.7       |      |            |                   |                        |      |           |      |              |      |                   |                      | V->I      | chr17 - | 77,093,008  | actin, gamma, cytoplasmic 1                            | Actins are highly conserved proteins that are involved in various types of cell motility, and maintenance of the cytoskeleton. The beta and gamma actins co-exist in m                                                                                                                                                                             |
| ZFP36L1    | ●●● | -0.5                                   | -0.4 | 0.1       |      |            | 3                 |                        |      |           |      |              |      |                   |                      | G->S      | chr14 - | 68,326,833  | zinc finger protein 36, C3H type-like 1                | putative nuclear transcription factor; member of the TIS11 family of early response genes; may regulate the response to growth factors [RGD].                                                                                                                                                                                                      |
| ANKA1      | ●●● | -3.5                                   | -2.2 | -1.0      |      |            |                   |                        |      |           |      |              |      |                   |                      | I/NSS     | chr9 +  | 74,965,864  | annexin A1                                             | plays a role in regulation of insulin secretion; may inhibit phospholipase A2                                                                                                                                                                                                                                                                      |
| SH3PXD2A   | ●●● | -0.2                                   | 0.6  | 0.4       |      |            |                   |                        |      |           |      |              |      |                   |                      | 3         | chr10 + | 105,474,464 | SH3 and PX domains 2A                                  | ...                                                                                                                                                                                                                                                                                                                                                |
| PHK8       | ●●● | -0.2                                   | 0.3  | 0.4       |      |            |                   | I (2)                  |      |           |      |              |      |                   |                      | I         | chr16 + | 46,172,823  | phosphorylase kinase, beta                             | expression in regenerating muscle may be correlated with that of other phosphorylase kinase subunits                                                                                                                                                                                                                                               |
| SRRM2      | ●●● | -0.4                                   | 0.9  | -0.1      |      |            |                   |                        |      |           |      |              |      |                   |                      |           | chr16 + | 2,751,872   | serine/arginine repetitive matrix 2                    | ...                                                                                                                                                                                                                                                                                                                                                |
| TMEM107    | ●●● | 2.5                                    | 0.2  | 0.9       |      |            |                   |                        |      |           |      |              |      |                   |                      | 3         | chr17 - | 8,918,790   | transmembrane protein 107 isoform 1                    | ...                                                                                                                                                                                                                                                                                                                                                |
| HLA-DRB6   | ●●● | -0.9                                   | 0.1  | -1.2      |      |            |                   |                        |      |           |      |              |      |                   |                      | NC        | chr6 -  | 32,632,112  | major histocompatibility complex, class II, DR beta 6  | Homo sapiens major histocompatibility complex, class II, DR beta 6 (pseudogene) (HLA-DRB6), non-coding RNA.                                                                                                                                                                                                                                        |
| ALKBH5     | ●●● | -0.9                                   | 1.6  | 0.4       |      |            |                   |                        |      |           |      |              |      |                   |                      | 3         | chr17 + | 18,040,792  | alkB, alkylation repair homolog 5                      | ...                                                                                                                                                                                                                                                                                                                                                |
| BAT2L      | ●●● | -1.1                                   | 1.2  | 0.4       |      |            |                   |                        |      |           |      |              |      |                   |                      | R->L      | chr9 +  | 133,330,347 | HLA-B associated transcript 2-like                     | ...                                                                                                                                                                                                                                                                                                                                                |
| CDKN2AIPNL | ●●● | 1.2                                    | -0.3 | -0.2      |      |            |                   |                        |      |           |      |              |      |                   |                      |           | chr5 -  | 133,610,065 | CDKN2A interacting protein N-terminal like             | ...                                                                                                                                                                                                                                                                                                                                                |
| AHNK       | ●●● | -0.2                                   | 0.0  | 0.5       |      |            | Syn               |                        |      |           |      |              |      |                   |                      |           | chr11 - | 62,014,250  | AHNK nucleoprotein isoform 3                           | ...                                                                                                                                                                                                                                                                                                                                                |
| COL1A1     | ●●● | 4.5                                    | 1.1  | -1.1      |      |            |                   |                        |      |           |      |              |      |                   |                      |           | chr17 - | 45,625,227  | alpha 1(I) type I collagen preproprotein               | pro-alpha1 chains of type I collagen whose triple helix comprises two alpha1 chains and one alpha2 chain. Type I is a fibril-forming collagen found in most connective t                                                                                                                                                                           |
| COL4A1     | ●●● | 2.3                                    | 0.4  | -1.5      |      |            |                   |                        |      |           |      |              |      |                   |                      | A->T, Syn | chr13 - | 109,678,404 | alpha 1(IV) type IV collagen preproprotein             | syndrome type VIIA, Ehlers-Danlos syndrome Classical type, Caffey Disease and idiopathic osteoporosis. Reciprocal translocations between chromosomes 17 and 22, w                                                                                                                                                                                  |
| FAM129B    | ●●● | -1.2                                   | -0.2 | -0.7      |      |            |                   |                        |      |           |      |              |      |                   |                      | 3, I      | chr9 -  | 129,344,264 | hypothetical protein LOC362115                         | the major type IV alpha collagen chain of basement membranes. Like the other members of the type IV collagen gene family, this gene is organized in a head-to-head                                                                                                                                                                                 |
| ITGB4      | ●●● | 1.1                                    | 4.2  | 2.5       |      |            |                   |                        |      |           |      |              |      |                   |                      | Syn (2)   | chr17 + | 71,248,932  | integrin beta 4                                        | beta subunit of integrin alpha6/beta4 which is a cell surface receptor for laminin; involved in hemidesmosome formation.                                                                                                                                                                                                                           |
| KRT13      | ●●● | -7.2                                   | -1.7 | -6.4      |      |            |                   |                        |      |           |      |              |      |                   |                      | Syn       | chr17 + | 36,913,075  | keratin 13                                             | human homolog plays a role in epidermal development                                                                                                                                                                                                                                                                                                |
| KRT5       | ●●● | -0.5                                   | -0.3 | 1.6       |      |            | 3, I (2), Syn (2) |                        |      |           |      |              |      |                   |                      | S->G      | chr12 - | 51,197,568  | keratin 5                                              | cytoskeletal intermediate filament protein; provides a cortical scaffold to primary spermatocytes                                                                                                                                                                                                                                                  |
| PID1       | ●●● | -1.4                                   | -3.5 | -3.6      |      |            |                   |                        |      |           |      |              |      |                   |                      | I         | chr2 -  | 229,720,617 | phosphotyrosine interaction domain containing 1        | 0                                                                                                                                                                                                                                                                                                                                                  |
| PLEC1      | ●●● | 1.7                                    | 1.7  | 1.0       |      |            |                   |                        |      |           |      |              |      |                   |                      |           | chr8 -  | 145,076,101 | plectin 1                                              | cytoskeletal cross-linking protein; interacts with all three major groups of cytoskeletal proteins, actin filaments, microtubules, and intermediate filaments                                                                                                                                                                                      |
| TGM3       | ●●● | -3.9                                   | -2.3 | -7.1      |      |            | 3                 |                        |      |           |      |              |      |                   |                      |           | chr20 + | 2,247,169   | transglutaminase 3 precursor                           | Transglutaminases are enzymes that catalyze the crosslinking of proteins by epsilon-gamma glutamyl lysine isopeptide bonds. Involved the later stages of cell envelop                                                                                                                                                                              |
