# Supplementary material for: Tumor Transcriptome Sequencing Reveals Allelic Expression Imbalances Associated with Copy Number Alterations
Source: PLoS One. 2010 Feb 19;5(2):e9317. doi: 10.1371/journal.pone.0009317 (PMC2824832; doi:10.1371/journal.pone.0009317)
Supplement: Table S3 — The three hundred most up-regulated and down-regulated genes in a comparison of tumor to normal tissue across the three patients. (0.04 MB XLS) [file pone.0009317.s011.xls]

## Sheet: Sheet1
300 most down-regulated	300 most up-regulated
TMPRSS11B	S100A7A
TNNC1	MMP12
XIRP2	MMP1
MAL	INHBA
MYH2	MMP11
CASQ1	PTHLH
MUC21	CALML5
CRNN	SPP1
MYBPC1	CYP4F11
SMPX	HAP1
CA3	RBP1
NRAP	AKR1C3
MYH7	COL4A6
MYPN	HMGA2
MB	LAMC2
ACTA1	HSD17B2
SLN	TM4SF19
MYOZ3	IRX2
LMOD2	HAS3
TRIM54	IL8
TTN	SLC6A2
KRT76	COL10A1
DDIT4L	HOXD10
ANKRD1	ODC1
KRT4	TREM2
SMYD1	ALOX12P2
CSRP3	SLC7A8
TXLNB	MMP10
PKIA	CA2
HSPB7	C16orf74
PDK4	IRX4
LDB3	EDIL3
ENO3	CBS
CEACAM7	SERPINE1
PYGM	PLAG1
CKMT2	KRT75
IL1F6	C19orf26
KBTBD10	SCN9A
KRT13	GPRIN1
MYF6	ENO2
DUSP27	KDELR3
RPTN	WNT10A
IGF1	HSD17B1
TRDN	TNFRSF18
HSPB6	FBXO2
MYBPC2	GALNT6
UNC45B	IL4I1
C10orf71	OASL
RBM24	SNORA39
LMOD3	CLDN1
TMOD4	B4GALNT1
KRT3	FST
ACTN2	NDRG4
SYPL2	KLRG2
PKHD1L1	EPB41L4B
CEACAM1	SLC28A3
ARPP-21	COL11A1
AOX1	IGF2BP2
WIF1	SHANK2
FMO2	SMOX
COL19A1	SCN8A
C18orf26	COL4A5
ABI3BP	GPNMB
NEB	ITGB4
DCLK1	TMEM132A
FLG	SLC2A1
TMOD1	TUBB3
ASB5	CELSR1
PTGFR	SNORA15
MYBPH	MET
XIRP1	WDR66
CACNA1S	WNT7B
KBTBD5	FAM64A
ATP2A1	AKR1C1
ADPRHL1	SNORD44
DES	MMP3
DARC	TNS4
P11	ACOT7
CASQ2	DSG2
SPTB	ODZ2
EYA2	TMEM45A
GCOM1	RTN4RL1
GPX3	NKD2
MMRN1	TMEM63C
MYOM2	PLEK2
TNNI2	CKB
TBX15	KCNK10
SMTNL2	ABCA12
MYLK3	PPP1R14C
SCN4A	PDE7A
DUSP26	FADS1
CMYA5	SNORA72
BEST3	C6orf150
MYL1	C20orf27
SYNPO2L	ADAP1
LAMB4	KLK9
NCAM1	TRPV3
ABCC9	RTN4R
SYNPO2	SLC35E4
PRELP	TNFRSF12A
ABCA8	CSPG4
CRCT1	E2F7
CLIC5	CTSL2
MGST1	ATP1B3
FAM3D	ACP5
TCAP	PPAP2C
STAC3	BAIAP2L2
C8orf79	HSPA12A
MURC	FOXE1
SPINK5	PMEPA1
PID1	DUSP10
RIC3	DNMT3B
PRUNE2	SNORA36B
KIAA1881	CEP72
SRL	ECE2
ALOX12	CELSR3
FHL1	CEBPB
IL33	SEMA3C
TNNI1	CHPF
LOR	PLAUR
TNXB	RNF152
APOD	POU3F1
SLC2A4	SQLE
CACNG1	RGS20
SLC7A2	TNK1
AGBL1	ETV4
TNNT3	WFDC5
ATP1A2	TRIB3
OTOP3	FANCE
CACNB4	ADAM12
SELP	AGRN
MGP	GPR56
EEF1A2	PLXNA1
MYH1	SNORD93
CLCN4	ITGAX
C4orf31	B4GALNT3
SCEL	KCNK1
ABCA10	GPR172A
SH3BGRL2	LRWD1
MAN1C1	CENPM
C6orf142	C9orf140
SFRP1	SOX15
THBS4	FOXM1
SLC27A6	AURKB
PREX2	NETO2
PDLIM3	KLF7
KRT78	TSPAN13
CHRNA1	ARHGAP8
CILP	SLC11A1
CAPN6	AKR1B10
CTTNBP2	PKMYT1
FLNC	PTPRZ1
ZNF365	PSMG3
ANK2	IRX3
FUT6	SSFA2
PADI2	BID
MEOX1	CASK
FILIP1	TTYH3
RBMS3	TFCP2L1
NR3C2	STEAP3
RORC	SCD5
MYOT	CRMP1
PTN	SLC7A11
GIMAP7	ZNF707
CXCL12	SNORA79
AMOT	CYB5R2
TLL1	CHST2
SCARA5	C20orf59
MYOG	SOX21
PRLR	MFSD3
ZFHX4	SDC4
CYSLTR1	CCNE1
EDNRB	SLC2A6
CGNL1	SLC35A2
RYR1	POSTN
GIMAP1	KCNK7
GPD1	CLCN2
CLDN5	ATP12A
DLG2	ARHGEF16
SPRR3	UBE2C
LTF	C20orf3
RNF180	GSDMA
HRC	TFRC
THSD7A	CYP27B1
FLJ41562	ADAMTS14
FAM13C1	ANO1
DMD	GABRE
PEG3	PTK7
SASH1	KIAA1644
DDN	ADAM8
ANXA9	CTHRC1
SCNN1B	PLOD3
KPRP	EFNB1
SELE	PYCARD
ANK1	SLC16A3
ABCA6	ITGA6
MYOM1	EFCAB4B
NEXN	KIAA1804
MUSTN1	LRFN4
AIF1L	SNORA55
RELN	CDCA3
SORBS1	FBXO41
SAMD5	PLAU
PRKAA2	MTSS1
TGM5	GOLGA7B
FAM107A	MPHOSPH6
HNMT	NEIL3
HOPX	PAQR4
MAOB	LOC553158
RHCG	FAM83A
CAND2	DARS2
SLC16A7	SLC3A2
AKAP6	EPHB4
TACR1	G6PD
SDPR	TP73
PRSS27	GPC1
BIN1	PHLDA2
IGSF10	ARSJ
MYO18B	CEP55
PDE4B	SLC38A5
COMP	FBXL8
CFB	ZNF469
SYTL4	SOCS1
CRAT	ADORA2B
PODN	WNT9A
FIBIN	GCLC
SLC44A3	DDX28
DPT	MMP15
SNED1	SNORA69
TRIM6	FOXC1
EYA4	FBXO27
HLF	SCPEP1
ATPGD1	SDF2L1
APLNR	SERINC2
ZBTB16	KCTD11
C9orf61	SNORA56
TMEM56	CHTF18
TMPRSS2	TPBG
FREM2	IMPDH1
CDH5	CBX6
SPARCL1	RANBP1
SPRR2F	ATP13A2
CCDC141	FHDC1
SLC6A1	TIGD5
ACTC1	PYGB
MFAP5	SNORA4
KLHL30	AHNAK2
C20orf82	BCAM
KLHL31	KIF26A
ABCA9	WDR67
CYP4B1	INHBB
FAT4	DCBLD1
CYP1B1	COL7A1
MAPT	AFAP1L2
AOC3	ST6GALNAC2
COL4A4	SLC16A1
EPDR1	DDIT4
ENPP2	CD2AP
C3	SNORA31
PAX9	TTPAL
TGFBR3	FSCN1
ANKRD23	LAPTM4B
ELTD1	SNORA71B
ADAMTSL1	SNORA66
GPR133	SERPINB7
ALPK3	DTYMK
CHGB	SLC2A9
ICA1	SEC14L2
CFH	FLJ37078
TGM3	SNORD75
LRRK2	CCL22
COL14A1	YDJC
CD302	SPNS1
CYP3A5	C8orf38
CHL1	LAMA3
EMP1	KIF26B
SSBP2	SLC4A3
MYL5	MRPL13
CCDC80	ARAP3
ITGA7	BPGM
METTL7A	DFNA5
MASP1	SLC7A5
SPRR2C	KRT10
PCDH10	VEGFA
KRT2	TMEM208
MEF2C	EPHB2
SYNM	NECAB3
JPH2	PYCRL
TMEM182	MAGEF1
CACNA2D1	PLK1
PLAGL1	BOK
JAM2	MTBP
LDOC1	PARD6B
TNNT1	TOP1MT
PDE4DIP	PC
SNORD114-28	ACSS1
MYH11	DNAJC2
S1PR1	TBC1D24
EGF	ITGB8
PTGIS	FAT1
