# Supplementary material for: Tumor Transcriptome Sequencing Reveals Allelic Expression Imbalances Associated with Copy Number Alterations
Source: PLoS One. 2010 Feb 19;5(2):e9317. doi: 10.1371/journal.pone.0009317 (PMC2824832; doi:10.1371/journal.pone.0009317)
Supplement: Table S7 — Copy number assay details. (0.02 MB XLS) [file pone.0009317.s015.xls]

## Sheet: Assays
	CN Assay
	Gene	Assay ID	Assay Location	Exon	Comments
	CPT1A	Hs02090990_cn	chr11:68284375	17
	CCND1	Hs02226007_cn	chr11:69172066	4
	CTTN	Hs01583858_cn	chr11:69956904	16
	PPFIA1	Hs01533061_cn	chr11:69900290	25
	SHANK2	Hs02326293_cn	chr11:70016183	7
	KRTAP5-7	Hs03175835_cn	chr11:70916725	1
	IFNE (within LOC554202)	Hs00544396_cn	chr9:21471697	1
	LOC554202	LOC4_CC2Z39N	120-420	4	Custom CN assay design
	CDKN2B	Hs00204932_cn	chr9:21998997	1
	C9orf82	Hs02537439_cn	chr9:26851115	5
	WIF1	Hs00483595_cn	chr12:63746735	6
	HMGA2	Hs00528796_cn	chr12:64508063	2
	THSD4	Hs02649228_cn	chr15:69336080	5
	ZNF217	Hs02339823_cn	chr20:51621747	4
	AIM1	Hs00393495_cn	chr6:107094026	7
	ENST00000366824 (Ensembl gene = ENSG00000203688)	e4_CCRRKPP	72-372	4	Custom CN assay design
	LOC647946	LOC3_CCX0BKU	1-201	3	Custom CN assay design
	PTPRG	Hs00279581_cn	chr3:62243528	28
	LMOD3	Hs02428910_cn	chr3:69251889	2
	RNF7	Hs03060366_cn	chr3:142947168	3
	TNFRSF21	Hs01695365_cn	chr6:47329099	4
	CD2AP	Hs02523986_cn	chr6:47579034	2
	C6orf138 (anti-sense)	Hs02114559_cn	chr6:48144323	1
